# Supplementary material
Source: Springer Nature journal article supplement (https://www.springermedizin.de/resource/supplementary/12978_2012_189_MOESM2_ESM.pdf/9602192)
Supplement: MOESM2 [file 9602192]

Distal factors

Socio-demographic factors

Intermediate factors

Clinical history

Obstetric history

Current pregnancy:  
Behavioural factors

Current pregnancy:  
Exposure to stressful events

Proximal factors

Current pregnancy:  
Prenatal care

Current pregnancy:  
Obstetric intercurrents

Current pregnancy:  
Childbirth assistance

Outcome

Severe maternal morbidity
